# Supplementary material for: Mitochondrial Variation of Bottlenose Dolphins (Tursiops truncatus) from the Canary Islands Suggests a Key Population for Conservation with High Connectivity within the North-East Atlantic Ocean
Source: MDPI journal article supplement (doi:10.3390/ani14060901), 2024-03-14
Supplement: s1 [file s1]

# Mitochondrial Variation of Bottlenose Dolphins (*Tursiops truncatus*) from the Canary Islands Suggests a Key Population for Conservation with High Connectivity within the North-East Atlantic Ocean

Daniel A. Gómez-Lobo <sup>1,2</sup>, Agustín P. Monteoliva <sup>2</sup>, Antonio Fernandez <sup>3</sup>, Manuel Arbelo <sup>3</sup>, Jesús de la Fuente <sup>3</sup>, Mónica Pérez-Gil <sup>4</sup>, Nuria Varo-Cruz <sup>4</sup>, Antonella Servidio <sup>4</sup>, Enrique Pérez-Gil <sup>4</sup>, Yaisel J. Borrell <sup>1</sup> and Laura Miralles <sup>1,2,\*</sup>

<sup>1</sup> Department of Functional Biology, University of Oviedo, 33006 Oviedo, Spain; dagomezlobo@uc.cl (D.A.G.-L.); borrellyaisel@uniovi.es (Y.J.B.)

<sup>2</sup> Department of Environmental Genetics, Ecohydros, 39600 Maliaño, Spain; apmonteoliva@ecohydros.com

<sup>3</sup> Veterinary Histology and Pathology, Atlantic Center for Cetacean Research, Institute of Animal Health and Food Safety (IUSA), Veterinary School, University of Las Palmas de Gran Canaria, 35001 Las Palmas, Spain; antonio.fernandez@ulpgc.es (A.F.); manuel.arbelo@ulpgc.es (M.A.); jesus.delafuente@ulpgc.es (J.d.l.F.)

<sup>4</sup> Cetaceans and Marine Research Institute of the Canary Islands (CEAMAR), 35509 Las Palmas, Spain; monica@ceamar.org (M.P.-G.); nuriavaro@hotmail.com (N.V.-C.); antonella@ceamar.org (A.S.); kikelanza@gmail.com (E.P.-G.)

\* Correspondence: miralleslaura@uniovi.es

**Table S1.** Detailed sampling data of bottlenose dolphins from the Canary Islands. New haplotypes from this study are marked in bold. New haplotype numeration follows date of sampling (CAN1 is the oldest and CAN15 the most recent to date)

| N | Sample  | Type      | Date     | Locality      | Haplotype   | Accession Number |
|---|---------|-----------|----------|---------------|-------------|------------------|
| 1 | CET0296 | Stranding | 11/5/05  | Gran Canaria  | <b>CAN1</b> | <b>OQ656769</b>  |
| 2 | CET0635 | Stranding | 18/11/12 | Gran Canaria  | <b>CAN4</b> | <b>OQ656772</b>  |
| 3 | CET0724 | Stranding | 23/7/14  | Gran Canaria  | Ttrunc12    | KF650794         |
| 4 | CET1200 | Stranding | 4/11/21  | Gran Canaria  | Ttrunc45    | KF650827         |
| 5 | CET0311 | Stranding | 18/9/05  | Fuerteventura | <b>CAN2</b> | <b>OQ656770</b>  |
| 6 | CET1133 | Stranding | 31/10/20 | Fuerteventura | Ttrunc46    | KF650828         |

*High Connectivity of Canarian Bottlenose Dolphins*

|           |                        |                  |                |                  |              |                 |
|-----------|------------------------|------------------|----------------|------------------|--------------|-----------------|
| <b>7</b>  | <b>CET0564</b>         | <b>Stranding</b> | <b>22/3/11</b> | <b>Lanzarote</b> | <b>CAN3</b>  | <b>OQ656771</b> |
| 8         | CET0305                | Stranding        | 18/7/05        | Lanzarote        | BSEA6        | KF570328        |
| 9         | CET0595                | Stranding        | 3/12/11        | Lanzarote        | Ttrunc12     | KF650794        |
| 10        | CET0640                | Stranding        | 20/12/12       | Lanzarote        | Ttrunc49     | KF650831        |
| <b>11</b> | <b>CET0662</b>         | <b>Stranding</b> | <b>2/5/13</b>  | <b>Tenerife</b>  | <b>CAN5</b>  | <b>OQ656773</b> |
| <b>12</b> | <b>CA_Ttr02_120721</b> | <b>Biopsy</b>    | <b>12/7/21</b> | <b>Tenerife</b>  | <b>CAN5</b>  | <b>OQ656773</b> |
| <b>13</b> | <b>CA_Ttr01_140721</b> | <b>Biopsy</b>    | <b>14/7/21</b> | <b>Tenerife</b>  | <b>CAN6</b>  | <b>OQ656774</b> |
| <b>14</b> | <b>CET1209</b>         | <b>Stranding</b> | <b>31/1/22</b> | <b>Tenerife</b>  | <b>CAN6</b>  | <b>OQ656774</b> |
| <b>15</b> | <b>CA_Ttr04_130422</b> | <b>Biopsy</b>    | <b>13/4/22</b> | <b>Tenerife</b>  | <b>CAN7</b>  | <b>OQ656775</b> |
| <b>16</b> | <b>CA_Ttr01_160422</b> | <b>Biopsy</b>    | <b>16/4/22</b> | <b>Tenerife</b>  | <b>CAN9</b>  | <b>OQ656777</b> |
| <b>17</b> | <b>CA_Ttr02_120422</b> | <b>Biopsy</b>    | <b>12/4/22</b> | <b>Tenerife</b>  | <b>CAN11</b> | <b>OQ656779</b> |
| <b>18</b> | <b>CA_Ttr02_130422</b> | <b>Biopsy</b>    | <b>13/4/22</b> | <b>Tenerife</b>  | <b>CAN12</b> | <b>OQ656780</b> |
| <b>19</b> | <b>CA_Ttr03_150422</b> | <b>Biopsy</b>    | <b>15/4/22</b> | <b>Tenerife</b>  | <b>CAN13</b> | <b>OQ656781</b> |
| <b>20</b> | <b>CA_Ttr05_150422</b> | <b>Biopsy</b>    | <b>15/4/22</b> | <b>Tenerife</b>  | <b>CAN14</b> | <b>OQ656782</b> |
| <b>21</b> | <b>CA_Ttr03_160422</b> | <b>Biopsy</b>    | <b>16/4/22</b> | <b>Tenerife</b>  | <b>CAN15</b> | <b>OQ656783</b> |
| 22        | CA_Ttr02_160422        | Biopsy           | 16/4/22        | Tenerife         | TT016        | DQ073656        |
| 23        | CA_Ttr02_150422        | Biopsy           | 15/4/22        | Tenerife         | TT027        | DQ073667        |
| 24        | CET0526                | Stranding        | 29/3/10        | Tenerife         | Ttrunc2      | KF650784        |
| 25        | CET0407                | Stranding        | 18/1/08        | Tenerife         | Ttrunc7      | KF650789        |
| 26        | CET0903                | Stranding        | 2/4/18         | Tenerife         | Ttrunc7      | KF650789        |

|           |                        |               |                |                  |              |                 |
|-----------|------------------------|---------------|----------------|------------------|--------------|-----------------|
| 27        | CA_Ttr01_130422        | Biopsy        | 13/4/22        | Tenerife         | Ttrunc7      | KF650789        |
| 28        | CET1042                | Stranding     | 23/11/19       | Tenerife         | Ttrunc9      | KF650791        |
| 29        | CA_Ttr03_130422        | Biopsy        | 13/4/22        | Tenerife         | Ttrunc9      | KF650791        |
| 30        | CA_Ttr01_120422        | Biopsy        | 12/4/22        | Tenerife         | Ttrunc11     | KF650793        |
| 31        | CA_Ttr03_120422        | Biopsy        | 12/4/22        | Tenerife         | Ttrunc11     | KF650793        |
| 32        | CET0450                | Stranding     | 13/5/08        | Tenerife         | Ttrunc13     | KF650795        |
| 33        | CA_Ttr01_110721        | Biopsy        | 11/7/21        | Tenerife         | Ttrunc13     | KF650795        |
| 34        | CA_Ttr01_140422        | Biopsy        | 14/4/22        | Tenerife         | Ttrunc13     | KF650795        |
| 35        | CA_Ttr03_140422        | Biopsy        | 14/4/22        | Tenerife         | Ttrunc13     | KF650795        |
| 36        | CA_Ttr01_150422        | Biopsy        | 15/4/22        | Tenerife         | Ttrunc13     | KF650795        |
| 37        | CA_Ttr02_140422        | Biopsy        | 14/4/22        | Tenerife         | Ttrunc27     | KF650809        |
| <b>38</b> | <b>CA_Ttr01_250721</b> | <b>Biopsy</b> | <b>25/7/21</b> | <b>La Gomera</b> | <b>CAN7</b>  | <b>OQ656775</b> |
| <b>39</b> | <b>CA_Ttr03_080921</b> | <b>Biopsy</b> | <b>8/9/21</b>  | <b>La Gomera</b> | <b>CAN7</b>  | <b>OQ656775</b> |
| <b>40</b> | <b>CA_Ttr01_290721</b> | <b>Biopsy</b> | <b>29/7/21</b> | <b>La Gomera</b> | <b>CAN8</b>  | <b>OQ656776</b> |
| <b>41</b> | <b>CA_Ttr03_060921</b> | <b>Biopsy</b> | <b>6/9/21</b>  | <b>La Gomera</b> | <b>CAN9</b>  | <b>OQ656777</b> |
| <b>42</b> | <b>CA_Ttr01_080921</b> | <b>Biopsy</b> | <b>8/9/21</b>  | <b>La Gomera</b> | <b>CAN10</b> | <b>OQ656778</b> |
| 43        | CA_Ttr02_060921        | Biopsy        | 6/9/21         | La Gomera        | TT016        | DQ073656        |
| 44        | CA_Ttr04_060921        | Biopsy        | 6/9/21         | La Gomera        | TT016        | DQ073656        |
| 45        | CA_Ttr02_070921        | Biopsy        | 7/9/21         | La Gomera        | TT027        | DQ073667        |
| 46        | CET0730                | Stranding     | 11/10/14       | La Gomera        | Ttrunc11     | KF650793        |

*High Connectivity of Canarian Bottlenose Dolphins*

|    |                 |        |        |           |          |          |
|----|-----------------|--------|--------|-----------|----------|----------|
| 47 | CA_Ttr02_080921 | Biopsy | 8/9/21 | La Gomera | Ttrunc11 | KF650793 |
| 48 | CA_Ttr01_070921 | Biopsy | 7/9/21 | La Gomera | Ttrunc13 | KF650795 |
| 49 | CA_Ttr01_040921 | Biopsy | 4/9/21 | La Gomera | Ttrunc46 | KF650828 |

---

**Table S2.** Comparison of genetic diversity indexes of Biopsies and Stranding samples in bottlenose dolphins from the Canary Islands including sample size ( $n$ ), segregating sites ( $S$ ), number of haplotypes ( $N_h$ ), number of unique haplotypes ( $h$ ), haplotype diversity ( $H_d$ ), nucleotide diversity ( $\pi$ ), and average number of nucleotide differences ( $k$ ). SD = standard deviation.

| Type      | $n$ | $S$ | $N_h$ | $H_d$ (SD)    | $\pi$   | $k$    |
|-----------|-----|-----|-------|---------------|---------|--------|
| Biopsy    | 31  | 36  | 19    | 0.955 (0.020) | 0.01564 | 9.916  |
| Stranding | 18  | 36  | 16    | 0.987 (0.023) | 0.01625 | 10.320 |

---
